# Supplementary material
Source: publisher figshare collection journal article supplement (https://frontiersin.figshare.com/ndownloader/files/14486813)
Supplement: Supplementary file [file 14486813]

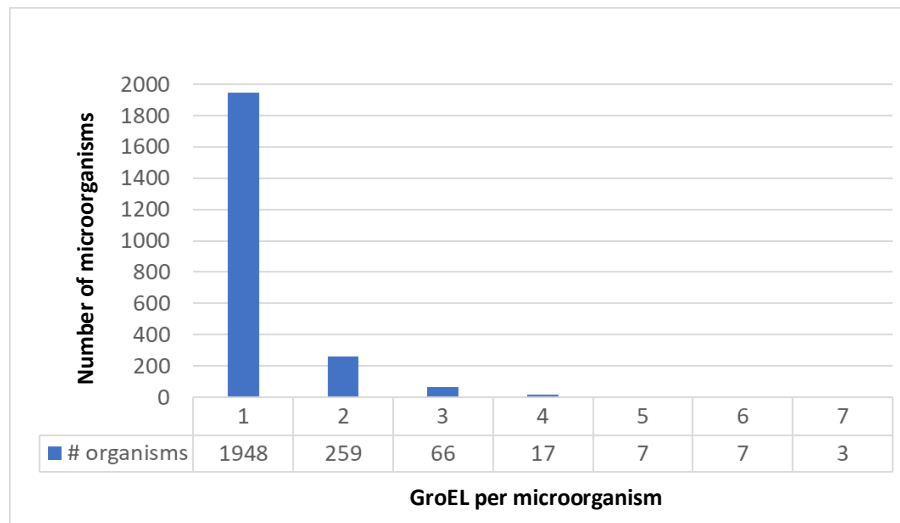

Supplementary Figure 1. Number of *groEL* sequences per microorganism. This graph shows the number of organisms in the study that had one or more *groEL* genes. All organisms had at least one gene, and it was rare for an organism to have more than two genes.
